# Supplementary material for: Pressure induced multi-centre bonding and metal–insulator transition in PtAl2
Source: Royal Society of Chemistry journal article supplement (doi:10.1039/c9cp02034a), 2019-01-01
Supplement: c9cp02034a1.pdf [file c9cp02034a1.pdf]

## Pressure induced multi-centre bonding and metal-insulator transition in PtAl<sub>2</sub>

P. Modak\* and Ashok K. Verma

High Pressure and Synchrotron Radiation Physics Division, Bhabha Atomic Research Centre,  
Trombay, Mumbai-400085, India

\*Corresponding author: pmodak@barc.gov.in

### SUPPLEMENTARY MATERIAL

**Lindhard susceptibility:** According to non-interacting Fermi gas model the Lindhard susceptibility function can be written as,

$$\chi_0(\vec{q}, \omega) = \frac{2}{\hbar} \int d\vec{k} f_{\vec{k}} (1 - f_{\vec{k}'}) \left[ \frac{1}{\omega + (\varepsilon_{\vec{k}} - \varepsilon_{\vec{k}'}) + i\eta} - \frac{1}{\omega - (\varepsilon_{\vec{k}} - \varepsilon_{\vec{k}'}) + i\eta} \right]$$

Where,  $\varepsilon$  is the electron's eigenvalue,  $\vec{k}' = \vec{k} + \vec{q}$  and  $f$  is the Fermi-Dirac distribution function. After simplification the real and imaginary parts of this complex function can be written as,

$$Re[\chi_0(\vec{q}, \omega)] = \frac{2}{(2\pi)^2} \int_{BZ} \frac{f_{\vec{k}'} - f_{\vec{k}}}{\omega + (\varepsilon_{\vec{k}} - \varepsilon_{\vec{k}'})} d\vec{k}$$

$$Im[\chi_0(\vec{q}, \omega)] = \frac{1}{2\pi} \int_{BZ} (f_{\vec{k}'} - f_{\vec{k}}) \delta(\omega + \varepsilon_{\vec{k}} - \varepsilon_{\vec{k}'}) d\vec{k}$$

In the static limit ( $\omega \rightarrow 0$ ) and  $Im[\chi_0(\vec{q}, \omega)] = 0$ ; using rescaled coordinates  $q \rightarrow k/k_F$  ( $k_F$  is the Fermi wave vector), the Lindhard function in 1, 2 and 3 dimension can be written as,

$$Re \chi_0 \propto -\frac{1}{2q} \ln \left| \frac{1+q/2}{1-q/2} \right| \quad \text{for 1D}$$

$$Re \chi_0 \propto \begin{cases} -1/E_F, & q < 2k_F \\ -(1 - \sqrt{1 - (2/q)^2}), & q \geq 2k_F \end{cases} \quad \text{for 2D}$$

and

$$Re \chi_0 \propto - \left[ 1 + \frac{1 - (q/2)^2}{q} \ln \left| \frac{1+q/2}{1-q/2} \right| \right] \quad \text{for 3D}$$

The graphical representation of  $\chi(q)$  for different dimension is shown below. Hence, the electronic response function diverges at  $q=2k_F$  for 1D systems and is discontinuous at  $q=2k_F$  for 2D systems. Our system is quasi 2D perpendicular to **b**-crystallographic axis.

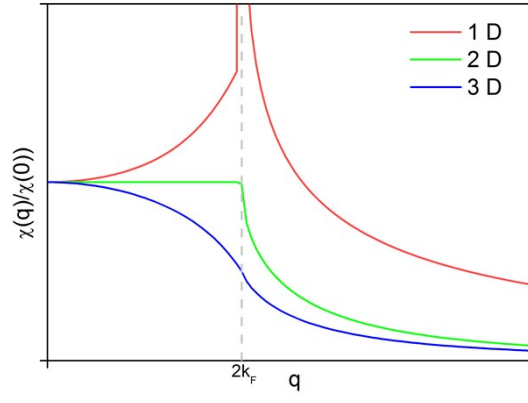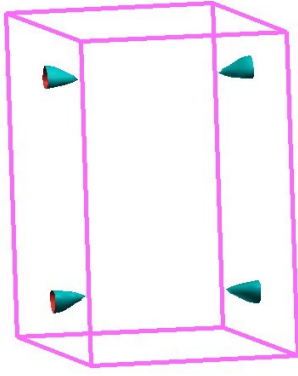

(a)

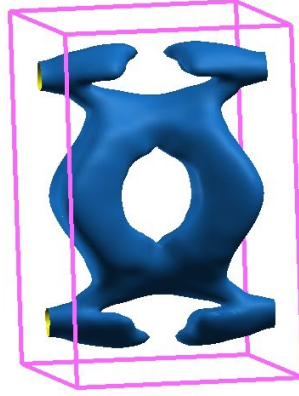

(b)

**FIG. S1:** Fermi surfaces for other two bands near 28 GPa in orthorhombic Pnma structure, horizontal direction is  $\mathbf{k}_z$ , vertical direction is  $\mathbf{k}_x$  and  $\mathbf{k}_y$  is perpendicular downward to the plane of paper.

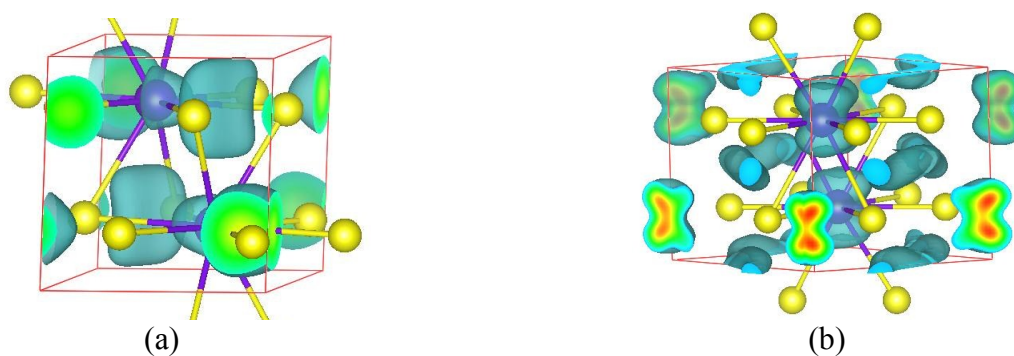

**FIG. S2:** Band decomposed charge density isosurface for isovalue 0.06, (a) corresponds to top of the valence band near Z-point (b) corresponds to bottom of the conduction band near S-point. All the charge density computed within an energy window of  $\pm 0.1$  eV. Yellow (small) sphere represents Al-atoms and Violet (big) sphere represents Pt-atoms.

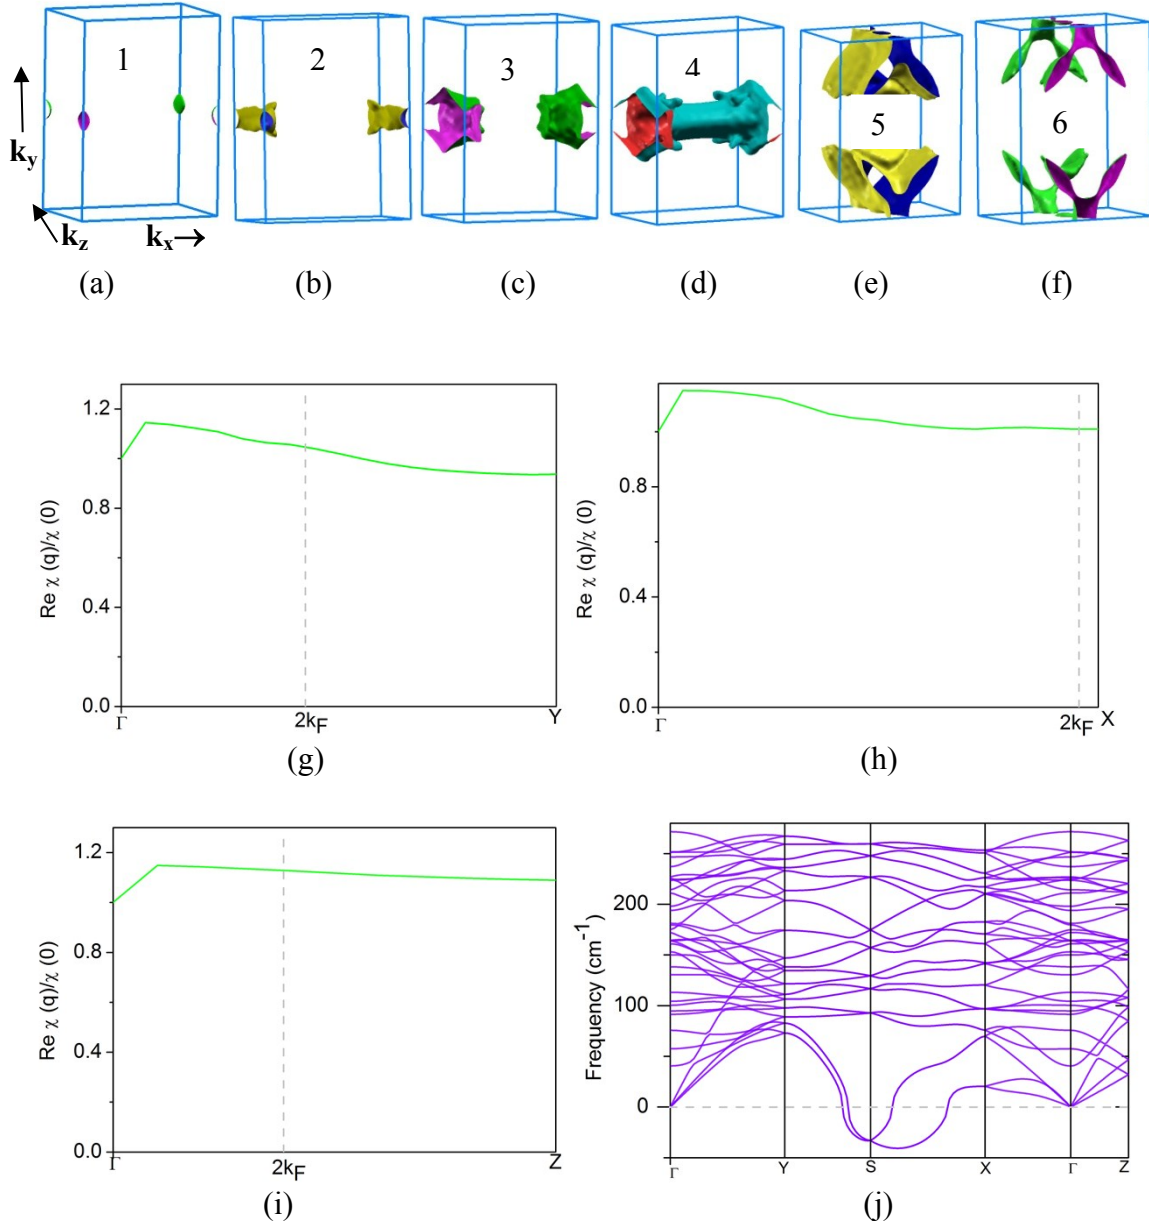

**FIG. S3:** Fermi surface (FS), electronic susceptibility and phonons of  $\text{PtIn}_2$  in the Pnma phase near Pnma to C2/m transition. (a-f) Fermi sheets corresponding to different bands, (g-i) electronic susceptibility along different high symmetry direction of BZ, and (j) phonon dispersions along some high symmetry directions of BZ.
